# Supplementary material for: Flux analysis of cholesterol biosynthesis in vivo reveals multiple tissue and cell-type specific pathways
Source: eLife journal article supplement (doi:10.7554/elife.07999), 2015-06-26
Supplement: supp [file elife-07999-supp-v1.zip]

Archive with 4 entries (4 files):
- elife_poa_e07999_Supplementary_File_1.docx
- elife_poa_e07999_Figure_2_figure_supplement_1.pdf
- elife_poa_e07999_Supplementary_File_3.docx
- elife_poa_e07999_Supplementary_File_2.docx
