# Supplementary material for: Flux analysis of cholesterol biosynthesis in vivo reveals multiple tissue and cell-type specific pathways
Source: eLife journal article supplement (doi:10.7554/elife.07999), 2015-06-26
Supplement: supp [file elife-07999-supp-v1.zip › elife_poa_e07999_Supplementary_File_3.docx]

**Supplementary File 3**. Primer sequences for real-time PCR of genes in the cholesterol biosynthetic pathway.

| Species | **Gene** | **Sequence (5' -> 3')** |
| --- | --- | --- |
| Human | HMGCR | CAAGGAGCATGCAAAGATAATCC GCCATTACGGTCCCACACA |
| Human | SQLE | GAGATGGAAGAAAGGTGACAGTCA CACCCGGCTGCAGGAAT |
| Human | LSS | CGCTCAACTATGTGTCTCTCAGAATT TGTTCCGGGCTCGTACCA |
| Human | CYP51A | GCAGGGATGCTTATTGGATTACTC AGAAGCCCATCCAAGCACTAG |
| Human | LBR | CAAAAGAACTGGCAGTGAGAACCT ACTCCTCCAAACTCCAAGTCCTT |
| Human | TM7sf2 | TGAAGGAGGCAGAGCTTCGA ACCCACGTAGAGCAACTGGAA |
| Human | SC4MOL | AGAAAAGCCGGCACCAAGA TCAAAGAGAGAATCAGCTCAAACTG |
| Human | NSDHL | CCCAGGTGCGGTTCTTTCT TACACCTTTCAGAGCTGGGTACAG |
| Human | HSD17B7 | ATGGAACAGAAGCTCTGGTATGG GTGGTGGCACTCAGATATTTGATC |
| Human | EBP | GCCCACAAAGACATGACTACCA GGCGGTCATTAGGTACAAAGTTG |
| Human | SC5D | GGGCACTGCTGAGGAATGAT CAACATCTGGCATTTTAAGCATAAG |
| Human | DHCR7 | ACGCTACACTCTGCCCACACT CAAGAGTAAATGCAGCCTAATGACA |
| Human | DHCR24 | GCGGGACATCCAGAAGCA CCGTGCACATGAAGGTCTTG |
| Human | 36B4 | GGCCTGAGCTCCCTGTCTCT GCGGTGCGTCAGGGATT |
|  |  |  |
| Mouse | DHCR24 | AGGCAGCTGGAGAAGTTTGTG CCTCGCGGTTCATATAGCAATC |
| Mouse | 36B4 | CACTGGTCTAGGACCCGAGAAG GGTGCCTCTGGAGATTTTCG |
