# Supplementary material for: Flux analysis of cholesterol biosynthesis in vivo reveals multiple tissue and cell-type specific pathways
Source: eLife journal article supplement (doi:10.7554/elife.07999), 2015-06-26
Supplement: supp [file elife_poa_e07999_Supplementary_File_1.docx]

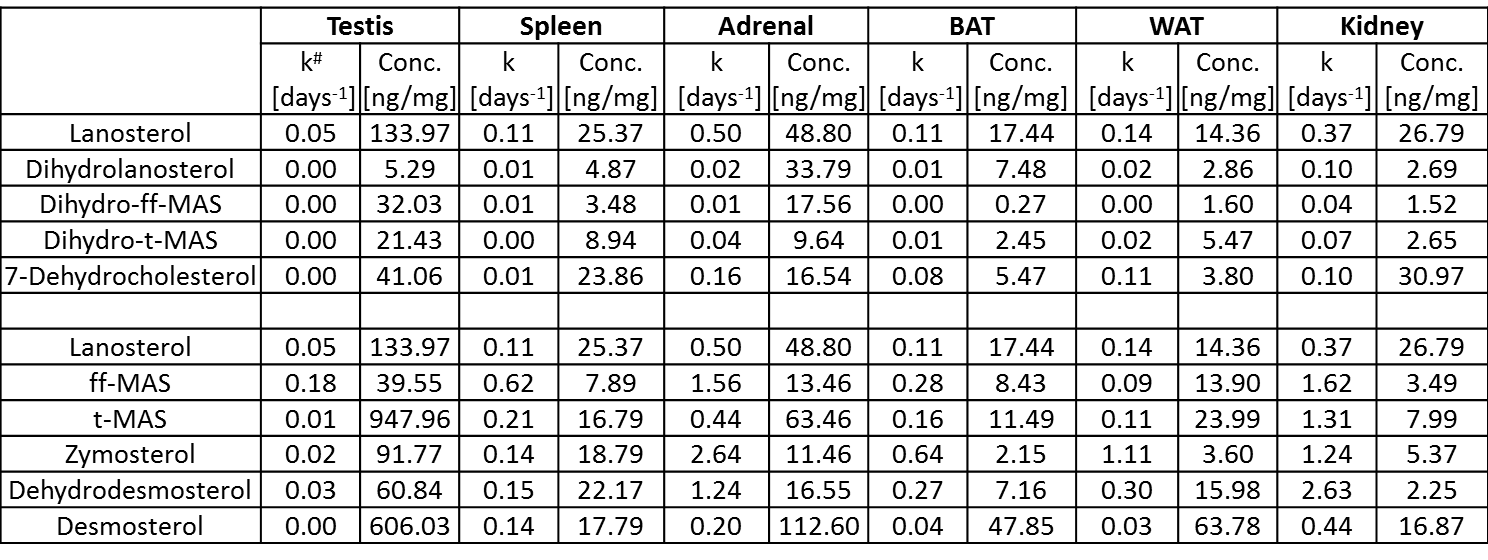
**Supplementary File 1:** Rate constants (k) and concentrations of cholesterol biosynthetic intermediates in mouse tissues.


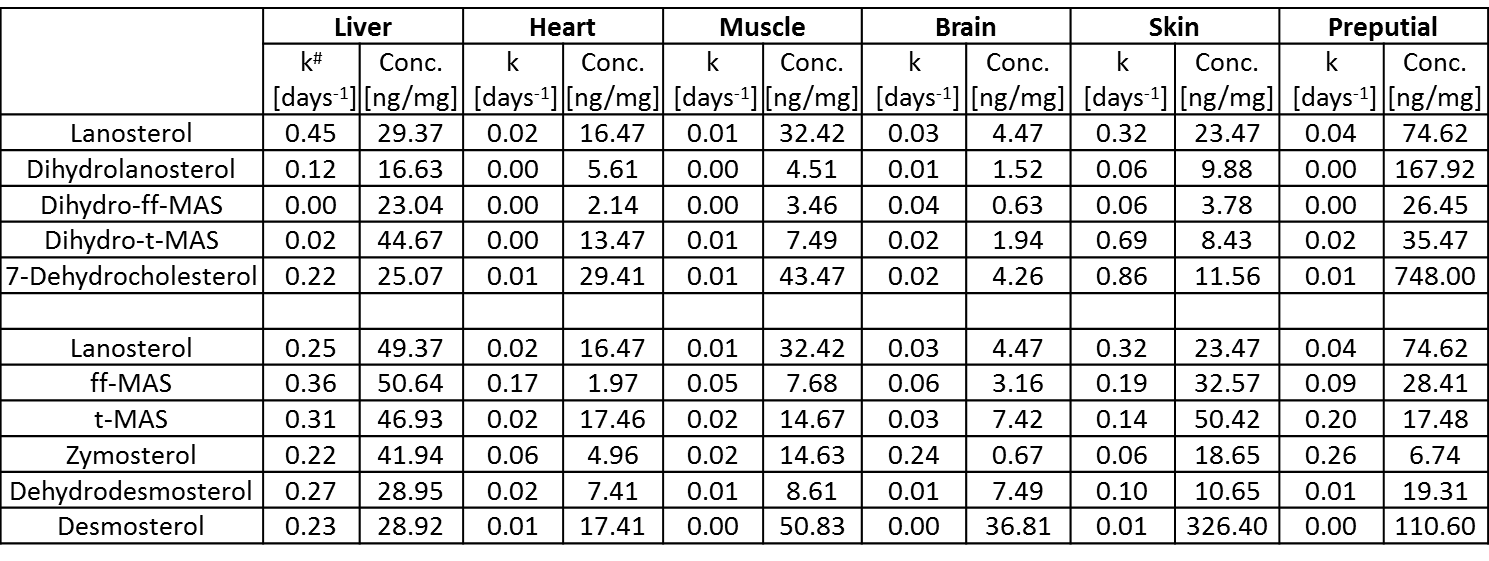


#- Rate constants were determined by fitting fractional deuterium labeling at each time point to the first order kinetic model.
g=1-e-kt using the Matlab curving fitting toolbox. Rate constants, as shown in the main figure, were determined by multiplying
k and concentration. See **Methods** for more details.
